# Supplementary material for: Attribution of Changes in small and large Floods across Brazil
Source: Copernicus journal article supplement (doi:10.5194/egusphere-2025-6456), 2026-01-15
Supplement: Supplementary file 1 [file egusphere-2025-6456-supplement.pdf]

## *Supplement of*

### **ATTRIBUTION OF CHANGES IN SMALL AND LARGE FLOODS ACROSS BRAZIL**

Gabriel Anzolin<sup>1</sup>; Vinícius B. P. Chagas<sup>1</sup>; Pedro L. B. Chaffe<sup>2</sup>

<sup>1</sup>Graduate Program of Environmental Engineering, Federal University of Santa Catarina, Florianópolis, Brazil.

<sup>2</sup>Department of Sanitary and Environmental Engineering, Federal University of Santa Catarina, Florianópolis, Brazil.

*Corresponding author: Gabriel Anzolin (gabriel\_anzolin@hotmail.com).*

#### **Contents of this file**

Figure S1.

Figure S2.

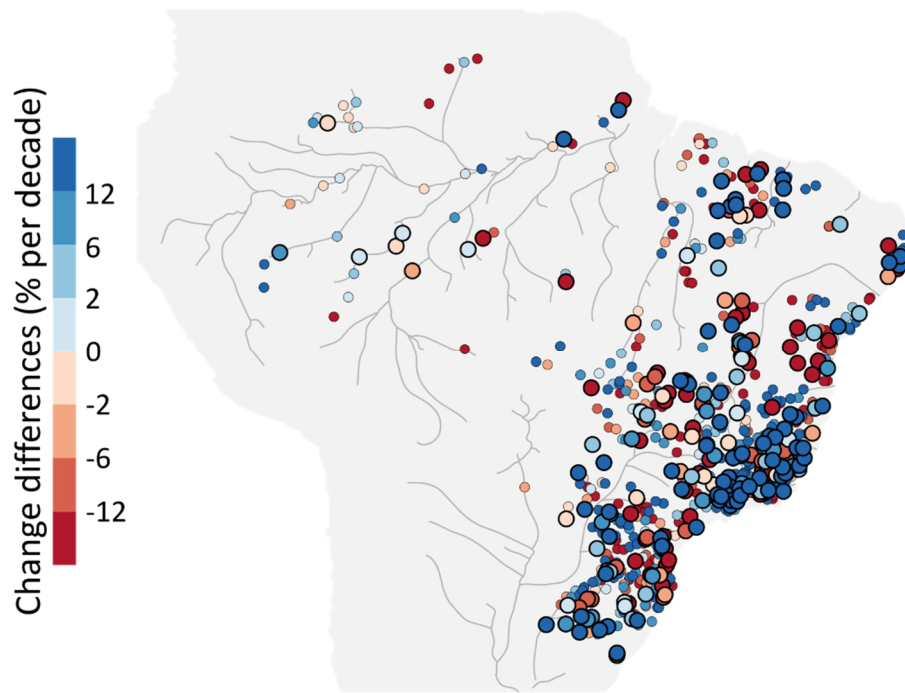

**Figure S1. Differences between the flood changes of large and small events. Large circles with thick borders indicate significance at an FDR-adjusted significance level ( $\alpha_{FDR} = 10\%$ ) of either small or large flood events.**

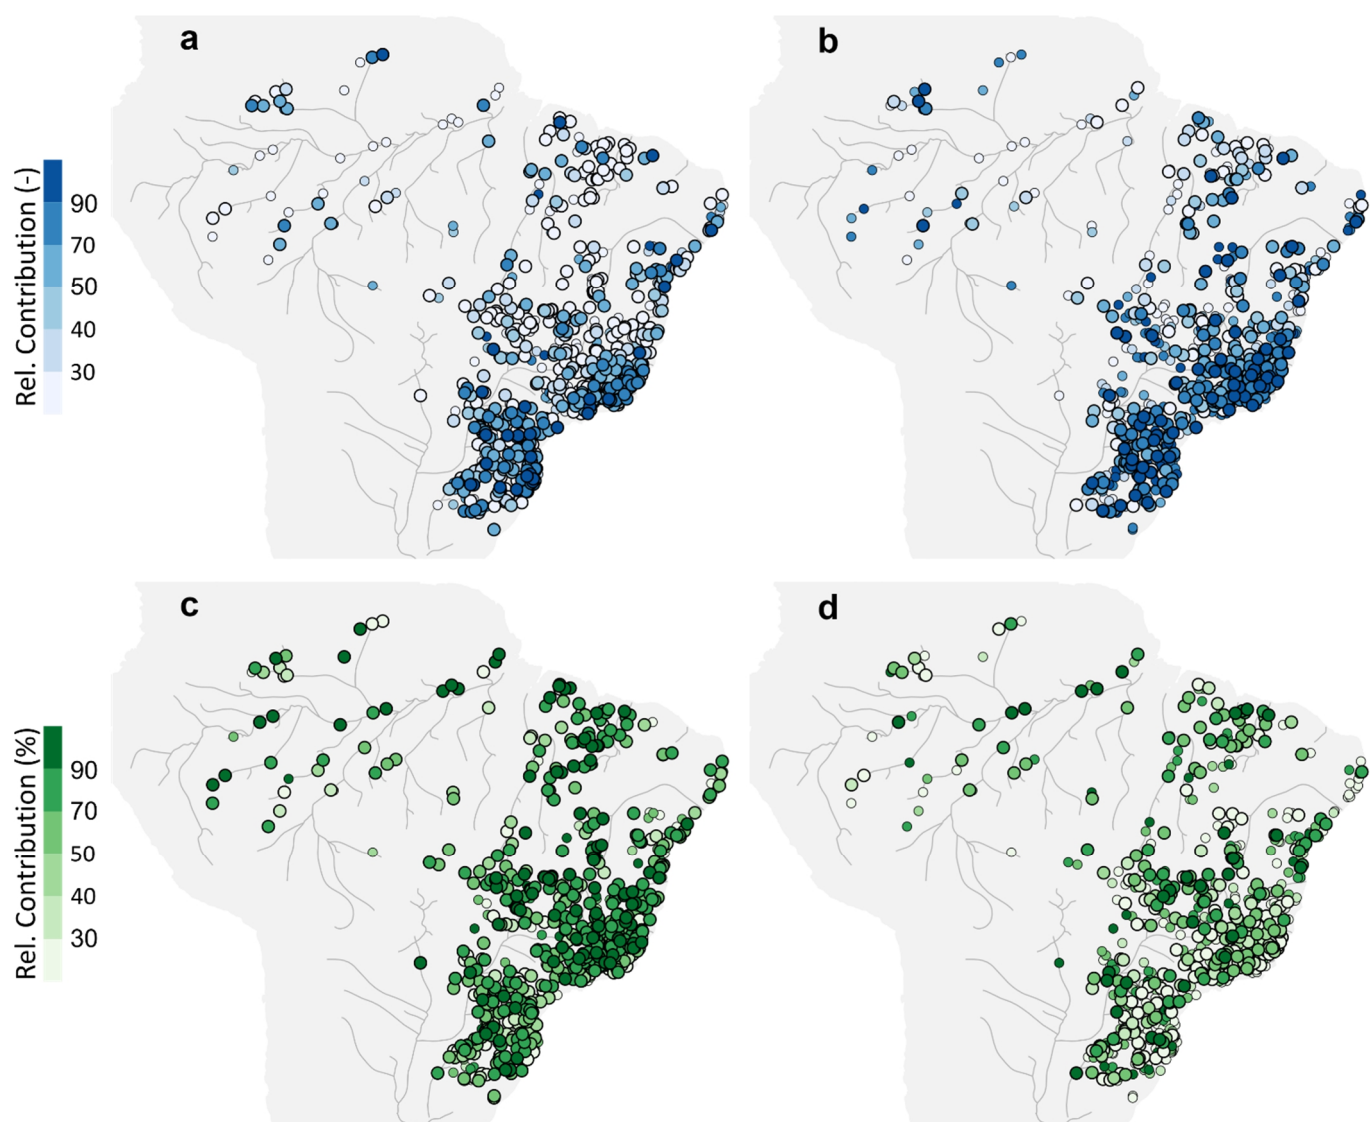

**Figure S2. Relative contribution of drivers to flood change. (a-b) Relative contributions of rainfall peak to flood change for (a) small and (b) large events. (c-d) As in (a-b), but for relative contributions of antecedent wetness to flood change. Large circles with thick borders in (a-d) indicate significance at an FDR-adjusted significance level ( $\alpha_{FDR} = 10\%$ ).**
